# Supplementary material for: Resistance to the Bacteriocin Lcn972 Deciphered by Genome Sequencing
Source: MDPI journal article supplement (doi:10.3390/microorganisms11020501), 2023-02-16

**Table S1.** Primers used in this work

| Name              | Sequence (5'-3')           | Position*                         | Reference            |
|-------------------|----------------------------|-----------------------------------|----------------------|
| <b>FDF</b>        | GCTCAACCATCATTTTCATCTGA    | LLMG_RS03515<br>(nt 669574)       | This work            |
| <b>FDR</b>        | TTAGCTGTTACTCTGCTTCCATC    | LLMG_RS03720<br>(nt 703837)       |                      |
| <b>Llmg2437UP</b> | ATAGGTTCACTATCATAATA       | LLMG_RS12235<br>(nt 2388181)      | This work            |
| <b>Llmg2437DW</b> | ATAAGAACAGGCATGTTGGC       | LLMG_RS12235<br>(nt 2388608)      |                      |
| <b>P0186F</b>     | GCAAGCTCGCATCGTTAATC       | LLMG_RS00980<br>(nt 174386)       | This work            |
| <b>P186R</b>      | TCCACCATCACTTCCATTCC       | LLMG_RS00980<br>(nt 175132)       |                      |
| <b>0734F</b>      | GAAATGGCCCTGCGACGTGTAG     | LLMG_RS03790<br>(nt 716407)       | Roces et al., 2012a  |
| <b>0752R</b>      | CGCTGCATCCAATGTCACAGTC     | LLMG_RS03885<br>(nt 741049)       |                      |
| <b>Tuf-F</b>      | GGTAGTTGTCGAAGAATGGAGTGTGA | tuf (reference)<br>(nt 2033,958). | Campelo et al., 2011 |
| <b>Tuf-R</b>      | TAAACCAGGTTCAATCACTCCACACA | tuf (reference)<br>(nt 2033983)   | Campelo et al., 2011 |
| <b>celB-qF</b>    | ATTTGGCCCGTGCTTACG         | LLMG_RS00985<br>(nt 176464)       | Campelo et al., 2011 |
| <b>celB-qR</b>    | TTTGGCAAACCTGCAAATAGG      | LLMG_RS00985<br>(nt 176521)       | Campelo et al., 2011 |
| <b>X1</b>         | TTTTGTCTGAATTCCAAAACCTCTT  | LLMG_RS12275<br>(nt 2398620)      | Roces et al., 2012b  |
| <b>X3</b>         | TGTTGATACATAAAAGCCCG       | LLMG_RS12280<br>(nt 2398989)      | Roces et al., 2012b  |

\*Accession MG1363: NC\_009004.1

## References

- Campelo AB, Gaspar P, Rocés C, Rodríguez A, Kok J, Kuipers OP, Neves AR, Martínez B. 2011. The Lcn972 bacteriocin-encoding plasmid pBL1 impairs cellobiose metabolism in *Lactococcus lactis*. *Appl Environ Microbiol.* 77(21):7576-7585. doi: 10.1128/AEM.06107-11
- Roces C., Courtin P., Kulakauskas S., Rodríguez A., Chapot-Chartier M. P., Martínez B. (2012a). Isolation of *Lactococcus lactis* mutants simultaneously resistant to the cell wall-active bacteriocin Lcn972, lysozyme, nisin and bacteriophage c2. *Appl. Environ. Microbiol.* 78 4157–4163. doi: 10.1128/AEM.00795-12
- Roces C., Pérez V., Campelo A. B., Blanco D., Kok J., Kuipers O. P., et al. (2012b). The putative lactococcal extracytoplasmic function anti-sigma factor *llmg2447* determines resistance to the cell wall-active bacteriocin lcn972. *Antimicrob. Agents Chemother.* 56:5520–5527. doi: 10.1128/AAC.01206-12

Table S2. Fermentation pattern of *Lactococcus cremoris* MG1363, MG1614 and the Lcn972R clone D1-20 determined by the commercial PhenePlate system (Bactus, Stockholm, Sweden) as recommended by the supplier. Shadowed cells indicate fermentation (+). w, weak reaction.

|            | MG1614 | D1-20 | MG1363 |
|------------|--------|-------|--------|
| Arabinose  |        |       |        |
| Xylose     |        |       |        |
| Galactose  | w      | w     | +      |
| Maltose    | +      |       | +      |
| Cellobiose |        | +     |        |
| Trehalose  | +      | +     | +      |
| Palatinose |        |       |        |
| Sucrose    |        |       |        |
| Lactose    |        |       |        |
| Melbiose   |        |       |        |
| Mannose    | +      |       | +      |
| Melezitose |        |       |        |
| Inosin     |        |       |        |
| Mannitol   | w      |       |        |
| Arbutin    |        |       |        |
| Sorbitol   |        |       |        |
| Raffinose  |        |       |        |
| Sorbose    |        |       |        |
| Rhamnose   |        |       |        |
| Tagatose   |        |       |        |
| Amygdalin  |        | +     |        |
| Gluconate  |        |       |        |
| Salicin    |        |       |        |
| empty      |        |       |        |

**Figure S1. PCR detection of the 33.8 kbp deletion present in *Lactococcus cremoris* MG1614.**

Primers FDF and FDR (Table S1) flanking the deletion were used in conventional PCR. Only when a deletion is present, a 500-bp fragment could be amplified. DNA templates were extracted from several *L. cremoris* strains related to MG1614 and D1-20 (in red). *L. cremoris* MG1363 is a plasmid-cured and prophage-free derivative of strain NCDO712 and is the ancestor of MG1614; D1 and D1-20 are Lcn972R mutants evolved from MG1614; MG1614.2 is MG1614 transformed with the plasmid encoding Lcn972 biosynthesis pBL1, and NZ9000 is another derivative of MG1363 suitable for nisin-inducible gene expression.

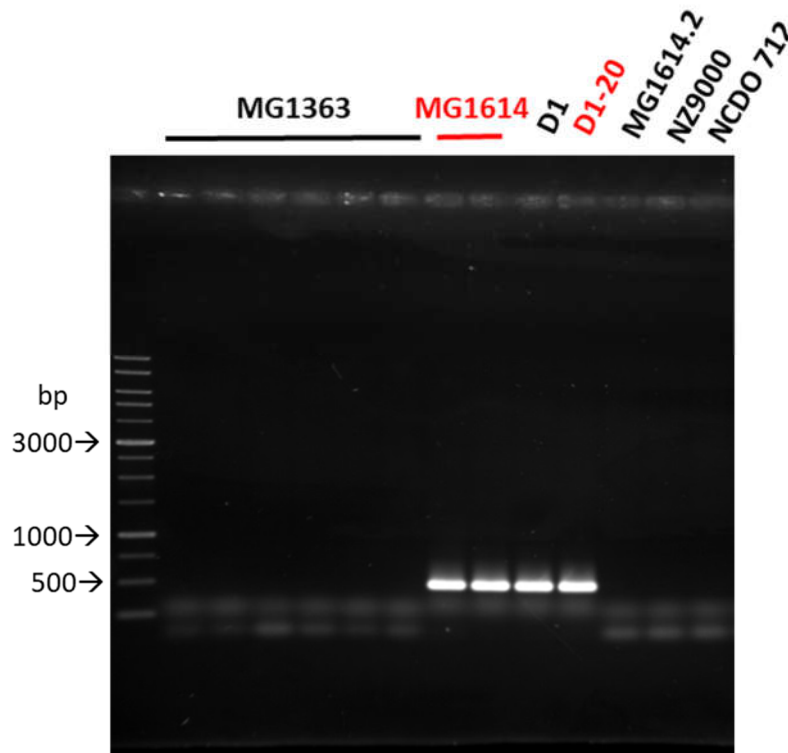

**Figure S2. Presence of pinpoint colonies in samples taken at the end of the evolution experiment.** *L. cremoris* MG1614 was grown in GM17 with 1,280 AU/mL Lcn972 and plated on GM17. 7A, 7B: biological replicates. M7A: representative GM17 plate from the control experiment without Lcn972.

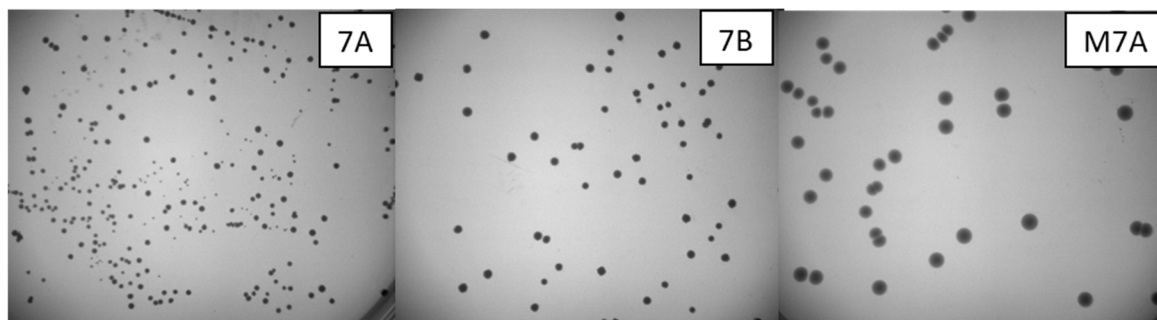

Supplement: s1 [file s1]
